# Supplementary material for: Does the herbicide active ingredient nicosulfuron show ecotoxic effects on aquaticorganisms and genotoxic effects on terrestrial plants?
Source: Research Square preprint supplement (doi:10.21203/rs.3.rs-6263636/v1), 2025-04-17
Supplement: Supplementary file 1 [file 827588b0d5fe809e56cd660a.docx]

**Table 1**: Cytogenetic analysis on root tips of *Lactuca sativa* exposed to solutions of S-metolachlor based herbicide

| Concentrations (mg L-1) | Mitotic Index | Chromosomal Alterations | Condensed Nuclei | Micronuclei |
| --- | --- | --- | --- | --- |
| C- | 16.74a | 0.00a | 0.40a | 0.20a |
| C+ | 11.88* | 1.80* | 10.00* | 8.80* |
| 7,5 | 9.28* | 0.00a | 0.60a | 2.60a |
| 15,0 | 8.96* | 0.40a | 0.80a | 3,58a |
| 30.0 | 10.88* | 0.00a | 6.60* | 4.40a* |
| 60.0 | 9.38* | 0.80a* | 8.40* | 3,80a |

The Mitotic Index is in percentages. The values for Chromosomal Alterations, Condensed Nuclei and Micronuclei are in frequency per one thousand cells. Values followed by a “*” differ significantly from the negative control while values followed by the letter “a” differ significantly from the positive control.
